# Supplementary material for: Online multifactorial prevention programme has no effect on the number of running-related injuries: a randomised controlled trial
Source: PubMed Central journal article supplement (PMC6900232; doi:10.1136/bjsports-2018-099744), 2019-04-06
Supplement: bjsports-2018-099744supp001.pdf [file bjsports-2018-099744supp001.pdf]

Number of injured runners per anatomical side and the differences between the intervention group (n=1196) and control group (n=1182)

| Injury location | All participants |      | Intervention group |      | Control group |      | Difference<br>% (95% CI) | OR (95% CI) <sup>a</sup> |
|-----------------|------------------|------|--------------------|------|---------------|------|--------------------------|--------------------------|
|                 | N                | %    | N                  | %    | N             | %    |                          |                          |
| Lower back      | 97               | 4.1  | 49                 | 4.1  | 48            | 4.1  | 0.0 (-1.6 ; 1.7)         | 1.03 (0.68 ; 1.54)       |
| Buttock         | 77               | 3.2  | 39                 | 3.3  | 38            | 3.2  | 0.1 (-1.5 ; 1.6)         | 1.04 (0.66 ; 1.63)       |
| Hip             | 115              | 4.8  | 57                 | 4.8  | 58            | 4.9  | -0.1 (-1.9 ; 1.8)        | 0.99 (0.68 ; 1.44)       |
| Groin           | 65               | 2.7  | 35                 | 2.9  | 30            | 2.5  | 0.4 (-1.0 ; 1.8)         | 1.18 (0.72 ; 1.94)       |
| Ventral thigh   | 44               | 1.9  | 18                 | 1.5  | 26            | 2.2  | -0.7 (-1.9 ; 0.5)        | 0.69 (0.38 ; 1.27)       |
| Dorsal thigh    | 83               | 3.5  | 33                 | 2.8  | 50            | 4.2  | -1.4 (-3.0 ; 0.1)        | 0.65 (0.42 ; 1.02)       |
| Knee            | 277              | 11.6 | 129                | 10.8 | 148           | 12.5 | -1.7 (-4.3 ; 1.0)        | 0.86 (0.67 ; 1.11)       |
| Shin            | 75               | 3.2  | 36                 | 3.0  | 39            | 3.3  | -0.3 (-1.8 ; 1.2)        | 0.93 (0.58 ; 1.47)       |
| Calf            | 156              | 6.6  | 82                 | 6.9  | 74            | 6.3  | 0.6 (-1.5 ; 2.7)         | 1.13 (0.81 ; 1.56)       |
| Achilles tendon | 100              | 4.2  | 52                 | 4.3  | 48            | 4.1  | 0.2 (-1.4 ; 2.0)         | 1.10 (0.73 ; 1.64)       |
| Ankle           | 114              | 4.8  | 62                 | 5.2  | 52            | 4.4  | 0.8 (-1.0 ; 2.6)         | 1.22 (0.83 ; 1.78)       |
| Foot            | 140              | 5.9  | 71                 | 5.9  | 69            | 5.8  | 0.1 (-1.9 ; 2.1)         | 1.04 (0.74 ; 1.47)       |
| Toe             | 26               | 1.1  | 12                 | 1.0  | 14            | 1.2  | -0.2 (-1.2 ; 0.7)        | 0.86 (0.40 ; 1.87)       |

<sup>a</sup> Control group is reference
