# Supplementary material for: Online multifactorial prevention programme has no effect on the number of running-related injuries: a randomised controlled trial
Source: PubMed Central journal article supplement (PMC6900232; doi:10.1136/bjsports-2018-099744), 2019-04-06
Supplement: bjsports-2018-099744supp002.pdf [file bjsports-2018-099744supp002.pdf]

Lower leg injuries in runners who indicated that used the biomechanics section (N=273) compared to the control group (N=1182)

| Intervention group |      | Control group |      | Difference        | OR (95% CI) <sup>a</sup> | Risk ratio (95% CI) |
|--------------------|------|---------------|------|-------------------|--------------------------|---------------------|
| N                  | %    | N             | %    | % (95% CI)        |                          |                     |
| 77                 | 28.2 | 178           | 15.1 | 13.2 (7.7 ; 19.1) | 1.74 (1.28 ; 2.37)       | 1.87 (1.48 ; 2.36)  |

<sup>a</sup> Control group is reference
